# Supplementary material for: A new national survey of centers for cognitive disorders and dementias in Italy
Source: Neurol Sci. 2023 Aug 18;45(2):525–38. doi: 10.1007/s10072-023-06958-8 (PMC10791890; doi:10.1007/s10072-023-06958-8)
Supplement: Supplementary file 1 — Supplementary file1 (DOCX 31.3 KB) [file 10072_2023_6958_MOESM1_ESM.docx]

Ilaria Bacigalupo1, Francesco Giaquinto2, Emanuela Salvi3, Giulia Carnevale4 , Roberta Vaccaro4,5, Fabio Matascioli4,6, Giulia Remoli7, Nicola Vanacore1, Patrizia Lorenzini1 and the Permanent Table of the National Dementia Plan Study Group and the CCDD Study Group

1National Centre for Disease Prevention and Health Promotion, Italian National Institute of Health, Rome, Italy,

2 Department of Human and Social Sciences, University of Salento, Lecce, Italy,

3 National Center for Drug Research and Evaluation, Italian National Institute of Health, Rome, Italy,

4Italian National Institute of Health FONDEM Study Group

5GINCO, Aware Aging Group, Como, Italy,

6 TAM Onlus, Social Cooperative, Naples, Italy,

7 Neurology Section, University of Milano-Bicocca, Milan, Italy

Corresponding author: Ilaria Bacigalupo

Submitted to Neurological Sciences

**Supplementary tab. 1** Distribution of Italian CCDDs according to regions and macro-areas, estimated number of dementia and estimated number of cases per CCDDs, response rate for the profile section and for the data collection form

| **Regions** | **Estimated cases of dementia*** | **N of CDCD** | **Ratio cases/CDCD** | **N of CDCD filling profile section** | **N of CDCD filling data collection form and in activity in 2019** |
| --- | --- | --- | --- | --- | --- |
| Emilia Romagna | 90250 | 63 | 1433 | 63 (100%) | 60 (95%) |
| Friuli Venezia Giulia | 26121 | 6 | 4354 | 6 (100%) | 6 (100%) |
| Liguria | 38202 | 7 | 5457 | 7 (100%) | 6 (86%) |
| Lombardia | 180896 | 73 | 2478 | 73 (100%) | 65 (89%) |
| Piemonte | 90271 | 22 | 4103 | 22 (100%) | 21 (95%) |
| Trentino Alto Adige | 18035 | 15 | 1202 | 15 (100%) | 13 (87%) |
| Valle d'Aosta | 2375 | 1 | 2375 | 1 (100%) | 0 (0%) |
| Veneto | 90234 | 36 | 2507 | 36 (100%) | 31 (86%) |
| **North** | **536384** | **223** | **2405** | **223 (100%)** | **202 (91%)** |
| Lazio | 101195 | 37§ | 2735 | 34 (92%) | 28 (76%) |
| Marche | 32458 | 16 | 2029 | 16 (100%) | 15 (94%) |
| Toscana | 79646 | 40 | 1991 | 40 (100%) | 30 (75%) |
| Umbria | 19420 | 12 | 1618 | 12 (100%) | 9 (75%) |
| **Centre** | **232719** | **105** | **2216** | **102 (97%)** | **82 (78%)** |
| Abruzzo | 25778 | 21 | 1228 | 20 (95%) | 16 (76%) |
| Basilicata | 10661 | 3 | 3554 | 3 (100%) | 2 (67%) |
| Calabria | 32666 | 38 | 860 | 34 (89%) | 32 (84%) |
| Campania | 78551 | 74 | 1062 | 73 (99%) | 68 (92%) |
| Molise | 6445 | 1 | 6445 | 1 (100%) | 1 (100%) |
| Puglia | 68451 | 26 | 2633 | 17 (65%) | 12 (46%) |
| Sardegna | 30364 | 14 | 2169 | 14 (100%) | 12 (86%) |
| Sicilia | 80453 | 29 | 2774 | 24 (83%) | 23 (79%) |
| **South/Islands** | **333369** | **206** | **1618** | **186 (91%)** | **166 (81%)** |
| **Total** | **1102472** | **534** | **2065** | **511 (96%)** | **450 (84%)** |

*****estimated cases were calculated by applying European prevalence rates (Bacigalupo et al. JAD 2018) to the ISTAT 2022 over-65 population divided by region

**Supplementary tab. 2** Distribution of Italian CCDDs according to presence or absence of branches and according to number of branches per regions and macro-area

| **Regions** | **Facilities without branches** | **Facilities with at least 1 branches** | **Facilities with 1 branch** | **Facilities with 2 branches** | **Facilities with 3 branches** | **Facilities with 4 branches** | **Facilities with 5 branches** | **Total of branches** |
| --- | --- | --- | --- | --- | --- | --- | --- | --- |
| Emilia Romagna | 55 | 8 | 4 | 3 | 1 |  |  | 13 |
| Friuli Venezia Giulia | 5 | 1 | 1 |  |  |  |  | 1 |
| Liguria | 1 | 6 | 1 | 2 | 2 | 1 |  | 15 |
| Lombardia | 66 | 7 | 6 |  | 1 |  |  | 9 |
| Piemonte | 14 | 8 | 3 | 4 | 1 |  |  | 14 |
| Trentino Alto Adige | 12 | 5 | 4 | 1 |  |  |  | 6 |
| Valle d’Aosta | 1 | 0 |  |  |  |  |  | 0 |
| Veneto | 26 | 10 | 5 | 2 | 3 |  |  | 18 |
| **North** | **180** | **45** | **24** | **12** | **8** | **1** | **0** | **76** |
| Lazio | 27 | 7 | 5 |  |  | 1 | 1 | 14 |
| Marche | 11 | 5 | 4 | 1 |  |  |  | 6 |
| Toscana | 33 | 7 | 2 | 4 | 1 |  |  | 13 |
| Umbria | 10 | 2 |  | 2 |  |  |  | 4 |
| **Centre** | **81** | **21** | **11** | **7** | **1** | **1** | **1** | **37** |
| Abruzzo | 19 | 1 | 1 |  |  |  |  | 1 |
| Basilicata | 3 | 0 |  |  |  |  |  | 0 |
| Calabria | 32 | 2 | 2 |  |  |  |  | 2 |
| Campania | 56 | 17 | 14 | 2 |  |  | 1 | 23 |
| Molise | 1 | 0 |  |  |  |  |  | 0 |
| Puglia | 13 | 4 | 4 |  |  |  |  | 4 |
| Sardegna | 11 | 3 | 1 |  |  | 2 |  | 9 |
| Sicilia | 19 | 5 | 3 |  | 1 |  | 1 | 11 |
| **South/Islands** | **154** | **32** | **25** | **2** | **1** | **2** | **2** | **50** |
| **Total** | **413 (80.8%)** | **98 (19.2%)** | **60 (11.7%)** | **21 (4.1%)** | **10 (1.9%)** | **4 (0.8%)** | **3 (0.6%)** | **163** |
